# Supplementary material for: Performance-improved Li-O2 batteries by tailoring the phases of MoxC porous nanorods as an efficient cathode
Source: Royal Society of Chemistry journal article supplement (doi:10.1039/c8nr04319a), 2018-01-01
Supplement: c8nr04319a1.pdf [file c8nr04319a1.pdf]

## Electronic Supplementary Information

### Performance-improved Li-O<sub>2</sub> Battery by Tailoring Phases of Mo<sub>x</sub>C Porous Nanorods as An Efficient Cathode

Hong Yu,<sup>\*†a</sup> Khang Ngoc Dinh,<sup>†c</sup> Yuanmiao Sun,<sup>c</sup> Haosen Fan,<sup>\*b</sup> Yonghui Wang,<sup>a</sup>

Yao Jing,<sup>a</sup> Shuzhou Li,<sup>c</sup> Madhavi Srinivasan,<sup>c</sup> Qingyu Yan<sup>\*c</sup>

<sup>a</sup> State Key Laboratory of Solidification Processing, Center of Advanced Lubrication  
and Seal Materials, School of Materials Science and Engineering, Northwestern  
Polytechnical University, Xi'an 710072, China.

<sup>b</sup> School of Chemistry and Chemical Engineering, Guangzhou University,  
Guangzhou 510006, China.

<sup>c</sup> School of Materials Science and Engineering and Energy Research Institute @ NTU  
(ERI@N), Interdisciplinary Graduate School, Nanyang Technological University,  
Block N4.1 Nanyang Avenue, 639798, Singapore.

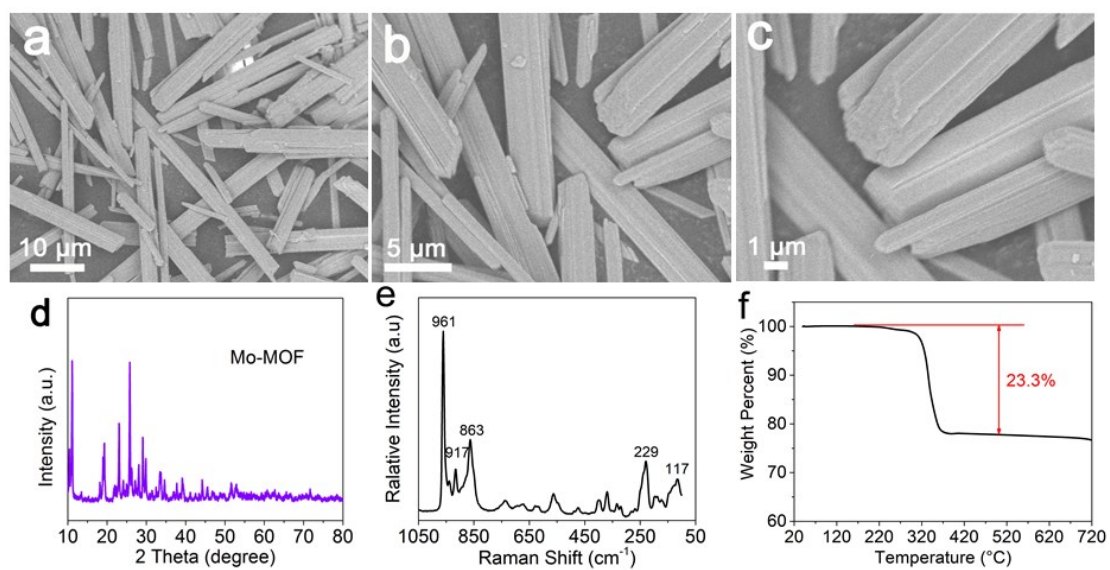

**Fig. S1** (a-c) FESEM images, (d) XRD patterns, (e) Raman spectra and (f) thermogravimetric analysis (TGA) of Mo-based MOF.

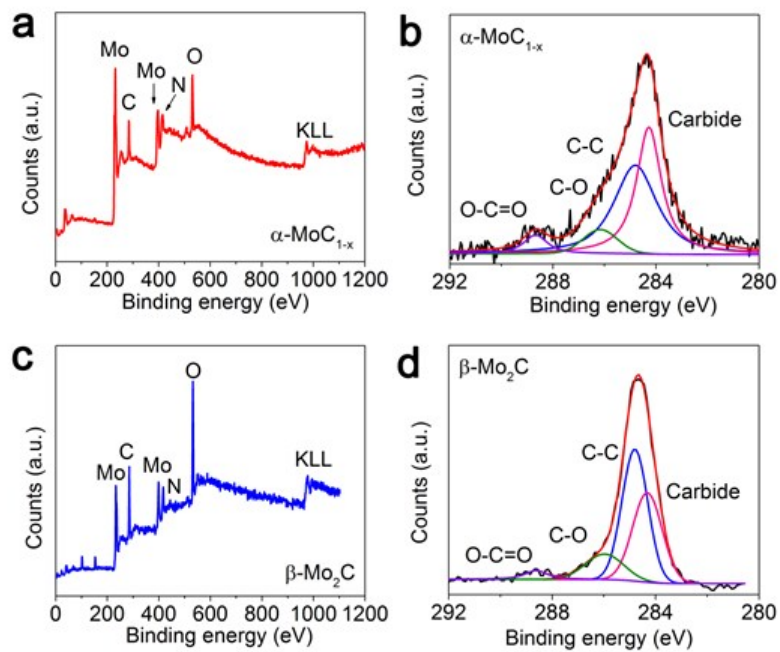

**Fig. S2** XPS survey spectrum of (a)  $\alpha$ -MoC<sub>1-x</sub> and (c)  $\beta$ -Mo<sub>2</sub>C. XPS high resolution scans of C 1s electrons of (b)  $\alpha$ -MoC<sub>1-x</sub> and (d)  $\beta$ -Mo<sub>2</sub>C.

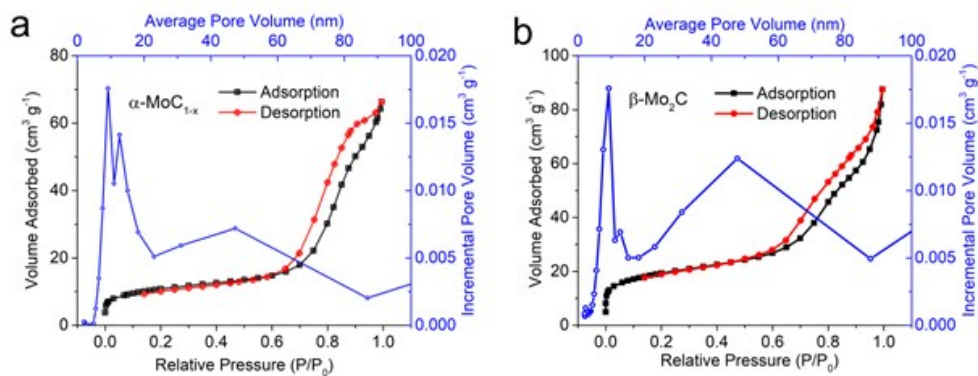

**Fig. S3** Nitrogen physisorption (adsorption/desorption) isotherms and BJH adsorption pore distribution curves of (a)  $\alpha$ -MoC<sub>1-x</sub> and (b)  $\beta$ -Mo<sub>2</sub>C.

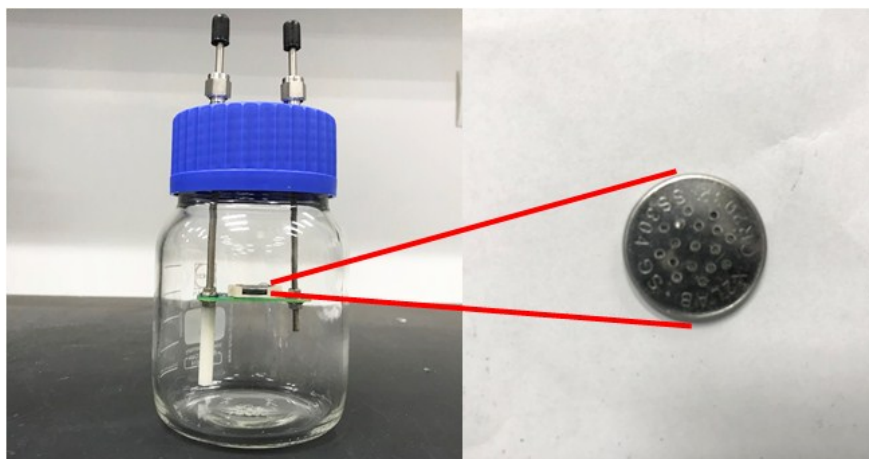

**Fig. S4** Set up of Li-O<sub>2</sub> batteries. The batteries are assembled with coin-type of cell.

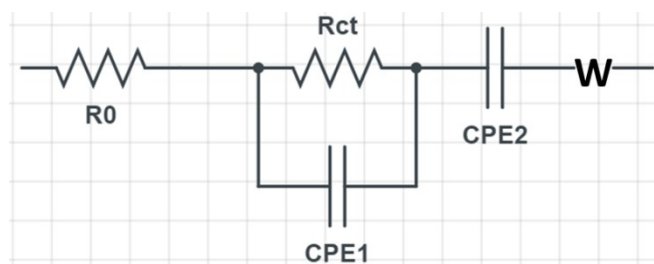

**Fig. S5** The equivalent electrical circuit for impedance analysis.

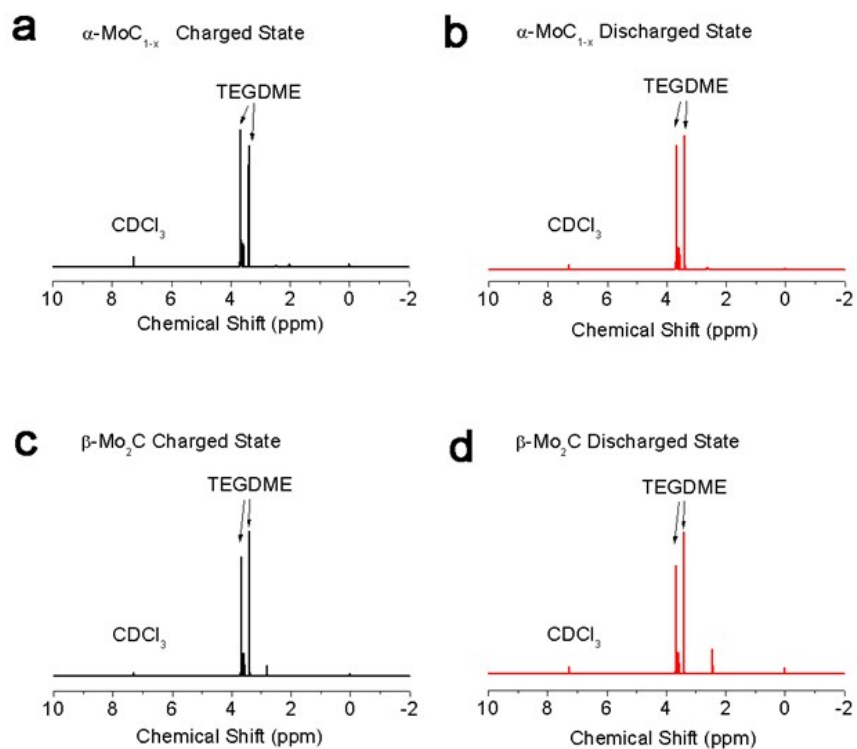

**Fig. S6**  $^1\text{H}$  NMR spectra of  $\alpha\text{-MoC}_{1-x}$  charged state (a) and (b) discharged state.  $^1\text{H}$  NMR spectra of  $\beta\text{-Mo}_2\text{C}$  charged state (a) and (b) discharged state.

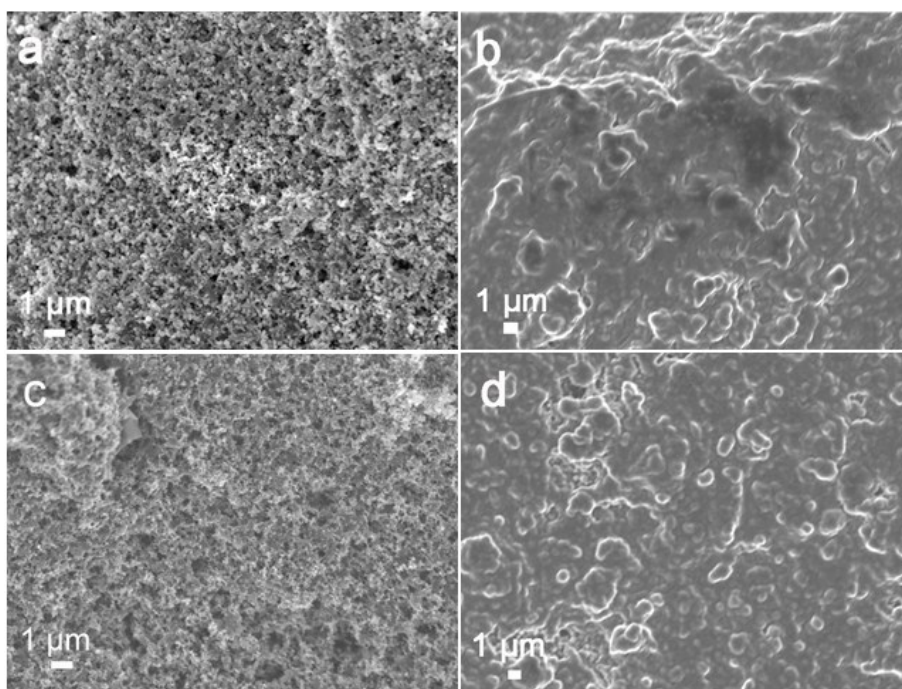

**Fig. S7** FESEM images of pristine and discharged  $\alpha$ -MoC<sub>1-x</sub> (a and b) and  $\beta$ -Mo<sub>2</sub>C (c and d).

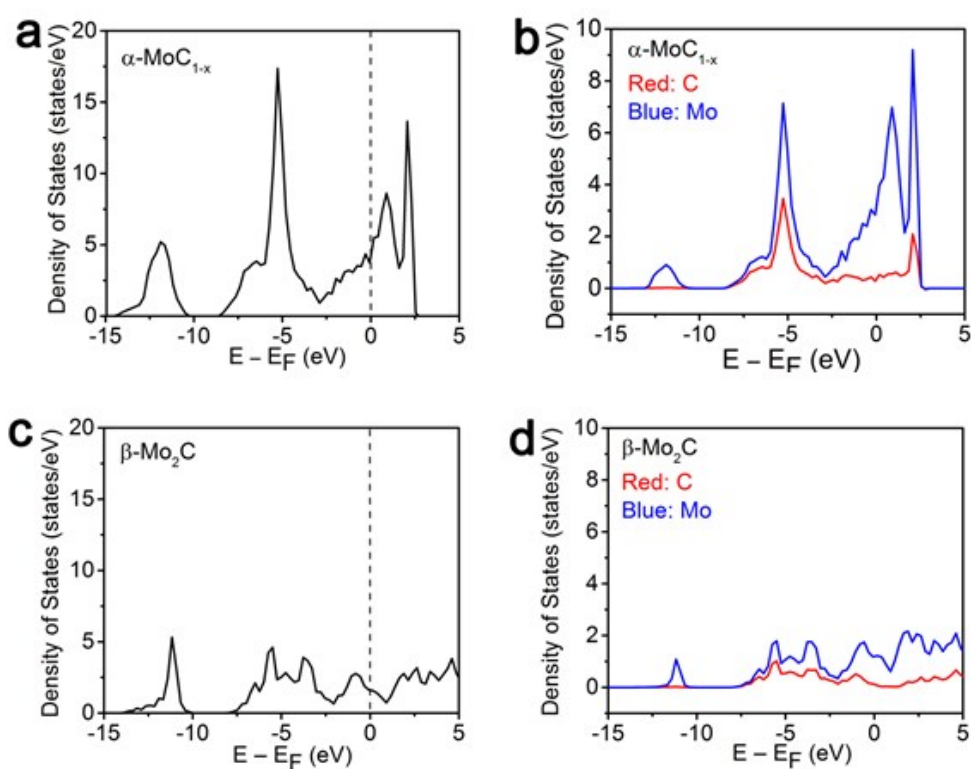

**Fig. S8** The total and projected density of states (TDOS and PDOS) of bulk crystal  $\alpha$ -MoC<sub>1-x</sub> (a and b) and  $\beta$ -Mo<sub>2</sub>C (c and d).

**Table S1** Comparison of cyclability of  $\alpha$ -MoC<sub>1-x</sub> with other well-performed electrocatalysts for Li-O<sub>2</sub> batteries.

|                                                        | Electrolyte | Cut-off capacity (mA h g <sup>-1</sup> ) | Number of cycles before dead | Charge voltage at 500 mA h g <sup>-1</sup> (V) | References                                |
|--------------------------------------------------------|-------------|------------------------------------------|------------------------------|------------------------------------------------|-------------------------------------------|
| TiC-C                                                  |             | 500                                      | 80 cycles                    |                                                | Chem. Commun., 2016, 52, 2713             |
| Carbon black                                           |             | 500                                      | 23                           | > 4.5                                          | Chem. Commun., 2016, 52, 2713             |
| TiC                                                    | TEGDME      | 500                                      | 25                           | Die at ~530 mAh g <sup>-1</sup>                | Nat. Mater., 2013, 12, 1050               |
| TiC                                                    | DMSO        | 350                                      | 100                          | N.A                                            | Nat. Mater., 2013, 12, 1050               |
| NiCo <sub>2</sub> O <sub>4</sub>                       | TEGDME      | 500                                      | 50                           | ~ 4.5                                          | J. Mater. Chem. A, 2014, 2, 12053         |
| Graphitic Porous Carbon-Co <sub>3</sub> O <sub>4</sub> | TEGDME      | 500                                      | 50                           | 4.4                                            | ACS Appl. Mater. Interfaces 2016, 8, 2796 |
| Au-Pt core-shell                                       | TEGDME      | 1000                                     | 20                           | 4.1                                            | J. Mater. Chem. A, 2014, 2, 10676         |
| RuO <sub>2</sub> @RGO                                  | TEGDME      | 1000                                     | 50                           | 4.0                                            | J. Mater. Chem. A, 2016, 4, 2403–2407     |
| p-CNT/Co <sub>3</sub> O <sub>4</sub>                   | TEGDME      | 500                                      | 115                          | > 4.5                                          | J. Mater. Chem. A, 2017, 5, 25501         |
| <b><math>\alpha</math>-MoC<sub>1-x</sub></b>           |             | <b>1000</b>                              | <b>100</b>                   | <b>4.2</b>                                     | <b>This work</b>                          |

**Table S2** Fitted values for equivalent circuit elements by simulation of electrochemical impedance spectroscopy in Fig. S4.

| Cathode catalyst            | $R_0$   |               | $R_{ct}$ |               |
|-----------------------------|---------|---------------|----------|---------------|
|                             | Initial | After cycling | Initial  | After cycling |
| $\alpha\text{-MoC}_{1-x}$   | 30.96   | 41.26         | 395.8    | 399.4         |
| $\beta\text{-Mo}_2\text{C}$ | 31.11   | 44.2          | 627.9    | 734.0         |
